# Supplementary material for: In situ co-crystallisation as a tool for low-temperature crystal engineeringElectronic supplementary information (ESI) available: details of the in situ melting point determinations and a plot of the variation in crystal density and melting point for 1–10. See http://www.rsc.org/suppdata/cc/b2/b208904a/
Source: Royal Society of Chemistry journal article supplement (doi:10.1039/b208904a), 2002-12-17
Supplement: b208904a.doc [file b208904a.doc]

# **Supplementary data**

***In situ* co-crystallisation as a tool for low-temperature crystal engineering**

**Andrew D. Bond**

**S1. Melting point determination**

Melting points were determined *in situ* by warming the single crystal after data collection. The temperature measured is the point at which the diffraction pattern is lost. Determination of the melting point in this manner is convenient since the entire experiment may be performed *in situ* on the diffractometer. All values were measured on the same instrument using the same N2 cryostream, so that the *relative* melting points (relevant to the discussion of the alternation effect) are as accurate as possible. The absolute values of the melting points are somewhat less accurate since the temperature measured at the nozzle of the gas stream is not the same as the temperature at the sample. To calibrate the temperature on an absolute scale, the melting points of heptanoic, octanoic, nonanoic and decanoic acid (in 0.2 mm capillaries) were measured by the same technique. These measurements clearly illustrate the melting point alternation in the pure *n*-alkyl carboxylic acids (confirming that the relative values are reliable), and provide calibration points across the entire temperature range of the melting points of **1**–**10**. Comparison with literature values (Aldrich) suggest that a correction of *ca.* 10 K is appropriate across the entire range. The melting points given in the main text are the corrected values, quoted to 3 significant figures.

**Calibration measurements:**

|  | Measured at  nozzle (K) | Literature  Value (K) |  (K) |
| --- | --- | --- | --- |
| Heptanoic acid | 271 | 262 | -9 |
| Octanoic acid | 299 | 289 | -10 |
| Nonanoic acid | 293 | 282 | -11 |
| Decanoic acid | 316 | 305 | -11 |

m.p. / K

Measured

Literature

Heptanoic acid

Octanoic acid

Nonanoic acid

Decanoic acid

# Supplementary information

***In situ* co-crystallisation as a tool for low-temperature crystal engineering**

**Andrew D. Bond**

**Melting point measurements for 1–10:**

|  | Measured at  nozzle (K) | Corrected  value (K) |
| --- | --- | --- |
| **1** |  |  |
| **2** | 278 | 268 |
| **3** | 262 | 252 |
| **4** | 270 | 260 |
| **5** | 270 | 260 |
| **6** | 282 | 272 |
| **7** | 292 | 282 |
| **8** | 293 | 283 |
| **9** | 305 | 295 |
| **10** | 310 | 300 |

**Corrected melting points (K):**

# Supplementary information

***In situ* co-crystallisation as a tool for low-temperature crystal engineering**

**Andrew D. Bond**

**S2. Variation of melting point and crystal density for 1-10**

m.p. / K

*Dc* / g cm-3
